# Supplementary material for: Dumb and Lazy? A Comparison of Color Learning and Memory Retrieval in Drones and Workers of the Buff-Tailed Bumblebee, Bombus terrestris, by Means of PER Conditioning
Source: PubMed Central journal article supplement (PMC4521843; doi:10.1371/journal.pone.0134248), 2015-07-31
Supplement: pone.0134248.s001.pdf [file pone.0134248.s001.pdf]

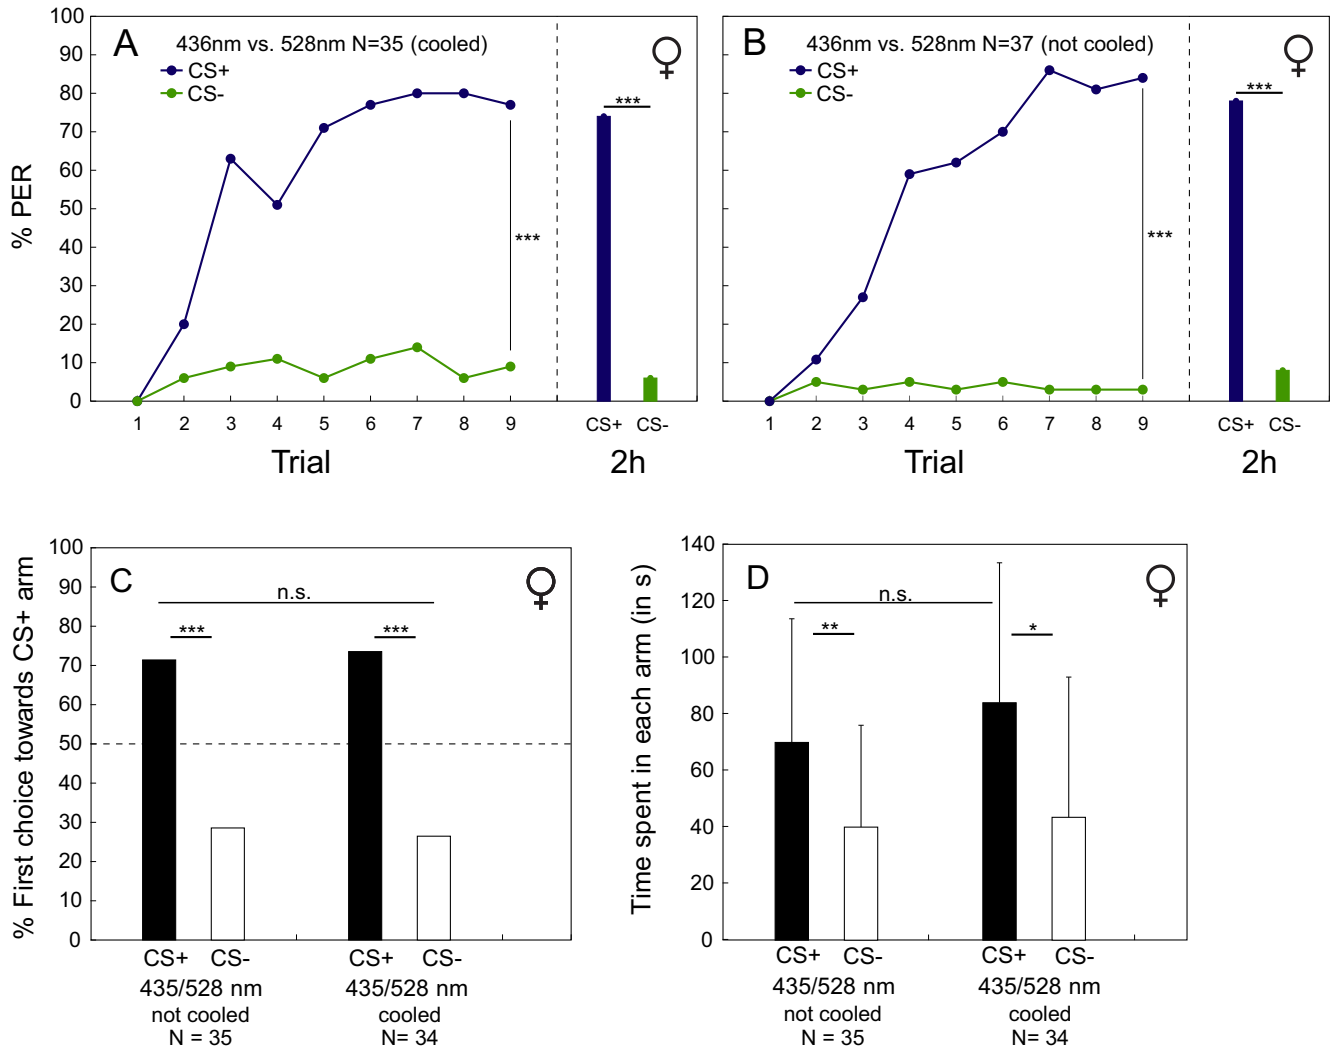

**S1 Fig. Effect of cooling on information transfer.**
